# Supplementary material
Source: bioRxiv or medRxiv preprint supplement (http://medrxiv.org/highwire/filestream/88204/field_highwire_adjunct_files/0/2020.07.01.20129882-1.pdf)
Supplement: Supplementary file [file 2020.07.01.20129882-1.pdf]

| Specimen ID | Patient ID | Days since symptom onset | BTNX Kit    |            | ACON         | SD        | Abbott SARS-CoV-2 IgG |
|-------------|------------|--------------------------|-------------|------------|--------------|-----------|-----------------------|
|             |            |                          | BTNX Kit 1  | BTNX Kit 2 | Laboratories | Biosensor |                       |
| AB146       |            | 25                       | -1 Negative | Negative   | NA           | NA        | Negative              |
| AB10        |            | 2                        | 0 IgM only  | IgM only   | NA           | NA        | NA                    |
| AB69        |            | 46                       | 0 Negative  | Negative   | NA           | NA        | Negative              |
| AB75        |            | 56                       | 0 Negative  | Negative   | NA           | NA        | Negative              |
| AB100       |            | 3                        | 0 Negative  | Negative   | NA           | NA        | Negative              |
| AB138       |            | 22                       | 0 Negative  | Negative   | NA           | NA        | Negative              |
| AB139       |            | 22                       | 0 Negative  | Negative   | NA           | NA        | Negative              |
| AB152       |            | 28                       | 0 Negative  | Negative   | NA           | NA        | Negative              |
| AB154       |            | 9                        | 0 Negative  | Negative   | NA           | NA        | Negative              |
| AB161       |            | 30                       | 0 Negative  | Negative   | NA           | NA        | Negative              |
| AB178       |            | 35                       | 0 Negative  | Negative   | NA           | NA        | Negative              |
| AB182       |            | 38                       | 0 IgM only  | Negative   | NA           | NA        | Negative              |
| AB186       |            | 12                       | 0 Negative  | Negative   | NA           | NA        | Negative              |
| AB194       |            | 9                        | 0 Negative  | Negative   | NA           | NA        | Negative              |
| AB199       |            | 3                        | 0 Negative  | Negative   | NA           | NA        | Negative              |
| AB222       |            | 9                        | 0 Negative  | Negative   | NA           | NA        | Negative              |
| AB232       |            | 3                        | 0 Negative  | Negative   | NA           | NA        | Negative              |
| AB237       |            | 32                       | 0 Negative  | Negative   | NA           | NA        | Negative              |
| AB240       |            | 3                        | 0 Negative  | Negative   | NA           | NA        | Negative              |
| AB242       |            | 12                       | 0 Negative  | Negative   | NA           | NA        | Negative              |
| AB294       |            | 30                       | 0 Negative  | Negative   | NA           | NA        | Negative              |
| AB303       |            | 46                       | 0 Negative  | Negative   | NA           | NA        | Negative              |
| AB314       |            | 56                       | 0 Negative  | Negative   | NA           | NA        | Negative              |
| AB340       |            | 6                        | 0 Negative  | Negative   | NA           | NA        | Negative              |
| AB345       |            | 28                       | 0 Negative  | Negative   | NA           | NA        | Negative              |
| AB354       |            | 46                       | 0 Negative  | Negative   | NA           | NA        | Negative              |
| AB368       |            | 38                       | 0 Negative  | Negative   | NA           | NA        | Negative              |
| AB370       |            | 28                       | 0 Negative  | Negative   | NA           | NA        | Negative              |
| AB376       |            | 12                       | 0 Negative  | Negative   | NA           | NA        | Negative              |
| AB377       |            | 38                       | 0 Negative  | Negative   | NA           | NA        | Negative              |
| AB392       |            | 29                       | 0 IgG only  | Negative   | NA           | NA        | Negative              |
| AB15        |            | 27                       | 1 Negative  | IgG + IgM  | NA           | NA        | Negative              |
| AB20        |            | 41                       | 1 Negative  | Negative   | NA           | NA        | Negative              |
| AB31        |            | 46                       | 1 Negative  | Negative   | NA           | NA        | NA                    |
| AB70        |            | 2                        | 1 IgM only  | IgG + IgM  | NA           | NA        | Positive              |
| AB74        |            | 2                        | 1 IgM only  | IgG + IgM  | NA           | NA        | Positive              |
| AB78        |            | 27                       | 1 IgG only  | IgG only   | NA           | NA        | Negative              |
| AB84        |            | 13                       | 1 Negative  | Negative   | NA           | NA        | Negative              |
| AB103       |            | 6                        | 1 Negative  | Negative   | NA           | NA        | Negative              |
| AB110       |            | 12                       | 1 Negative  | Negative   | NA           | NA        | NA                    |
| AB111       |            | 13                       | 1 Negative  | Negative   | NA           | NA        | Negative              |
| AB112       |            | 13                       | 1 Negative  | Negative   | NA           | NA        | Negative              |
| AB114       |            | 12                       | 1 Negative  | Negative   | NA           | NA        | NA                    |
| AB121       |            | 3                        | 1 Negative  | Negative   | NA           | NA        | Negative              |
| AB183       |            | 39                       | 1 Negative  | Negative   | NA           | NA        | Negative              |
| AB277       |            | 41                       | 1 Negative  | Negative   | NA           | NA        | Negative              |
| AB281       |            | 39                       | 1 Negative  | Negative   | NA           | NA        | Negative              |
| AB286       |            | 54                       | 1 Negative  | Negative   | NA           | NA        | Negative              |
| AB287       |            | 39                       | 1 Negative  | Negative   | NA           | NA        | Negative              |
| AB302       |            | 46                       | 1 Negative  | Negative   | NA           | NA        | NA                    |
| AB310       |            | 35                       | 1 Negative  | Negative   | NA           | NA        | Negative              |
| AB332       |            | 57                       | 1 Negative  | IgG only   | NA           | NA        | Negative              |
| AB344       |            | 27                       | 1 IgG only  | IgG only   | NA           | NA        | Negative              |

| Specimen ID | Patient ID | Days since symptom onset | BTNX Kit   |            | ACON         | SD        | Abbott SARS-CoV-2 IgG |
|-------------|------------|--------------------------|------------|------------|--------------|-----------|-----------------------|
|             |            |                          | BTNX Kit 1 | BTNX Kit 2 | Laboratories | Biosensor |                       |
| AB355       | 41         | 1                        | Negative   | Negative   | NA           | NA        | Negative              |
| AB359       | 13         | 1                        | Negative   | Negative   | NA           | NA        | Negative              |
| AB382       | 54         | 1                        | Negative   | Negative   | NA           | NA        | Negative              |
| AB394       | 56         | 1                        | Negative   | Negative   | NA           | NA        | Negative              |
| AB398       | 41         | 1                        | Negative   | Negative   | NA           | NA        | Negative              |
| AB5         | 35         | 2                        | Negative   | Negative   | NA           | NA        | Negative              |
| AB11        | 11         | 2                        | Negative   | Negative   | NA           | NA        | Negative              |
| AB27        | 2          | 2                        | IgM only   | IgG + IgM  | NA           | NA        | Positive              |
| AB42        | 2          | 2                        | IgM only   | IgG + IgM  | NA           | NA        | Positive              |
| AB55        | 46         | 2                        | Negative   | Negative   | NA           | NA        | NA                    |
| AB67        | 11         | 2                        | Negative   | Negative   | NA           | NA        | Negative              |
| AB79        | 39         | 2                        | Negative   | Negative   | NA           | NA        | Negative              |
| AB95        | 66         | 2                        | Negative   | Negative   | NA           | NA        | Negative              |
| AB105       | 8          | 2                        | Negative   | Negative   | NA           | NA        | Negative              |
| AB197       | 26         | 2                        | IgG only   | Negative   | NA           | NA        | NA                    |
| AB291       | 11         | 2                        | Negative   | Negative   | NA           | NA        | Negative              |
| AB322       | 26         | 2                        | IgG only   | Negative   | NA           | NA        | NA                    |
| AB323       | 26         | 2                        | IgG only   | Negative   | NA           | NA        | NA                    |
| AB326       | 6          | 2                        | Negative   | Negative   | NA           | NA        | NA                    |
| AB328       | 2          | 2                        | IgG + IgM  | IgG + IgM  | NA           | NA        | Positive              |
| AB361       | 17         | 2                        | Negative   | Negative   | NA           | NA        | Negative              |
| AB367       | 61         | 2                        | Negative   | Negative   | NA           | NA        | Negative              |
| AB375       | 27         | 2                        | IgG only   | IgG only   | NA           | NA        | Negative              |
| AB378       | 11         | 2                        | Negative   | Negative   | NA           | NA        | Negative              |
| AB381       | 46         | 2                        | Negative   | Negative   | NA           | NA        | NA                    |
| AB401       | 39         | 2                        | Negative   | Negative   | NA           | NA        | Negative              |
| AB35        | 2          | 3                        | IgM only   | IgG + IgM  | NA           | NA        | NA                    |
| AB39        | 2          | 3                        | IgG + IgM  | IgG + IgM  | NA           | NA        | NA                    |
| AB50        | 2          | 3                        | Negative   | IgG + IgM  | NA           | NA        | NA                    |
| AB61        | 29         | 3                        | IgG + IgM  | Negative   | NA           | NA        | NA                    |
| AB71        | 33         | 3                        | IgG + IgM  | IgG + IgM  | NA           | NA        | NA                    |
| AB86        | 39         | 3                        | Negative   | Negative   | NA           | NA        | NA                    |
| AB113       | 14         | 3                        | Negative   | Negative   | NA           | NA        | Negative              |
| AB119       | 8          | 3                        | Negative   | Negative   | NA           | NA        | NA                    |
| AB120       | 17         | 3                        | Negative   | Negative   | NA           | NA        | NA                    |
| AB129       | 19         | 3                        | IgG only   | Negative   | NA           | NA        | NA                    |
| AB147       | 26         | 3                        | IgG only   | Negative   | NA           | NA        | NA                    |
| AB169       | 19         | 3                        | Negative   | Negative   | NA           | NA        | NA                    |
| AB212       | 44         | 3                        | Negative   | Negative   | NA           | NA        | Negative              |
| AB216       | 22         | 3                        | Negative   | Negative   | NA           | NA        | Negative              |
| AB230       | 46         | 3                        | Negative   | Negative   | NA           | NA        | NA                    |
| AB235       | 6          | 3                        | Negative   | Negative   | NA           | NA        | NA                    |
| AB243       | 44         | 3                        | Negative   | Negative   | NA           | NA        | Negative              |
| AB278       | 33         | 3                        | IgG + IgM  | IgG + IgM  | NA           | NA        | NA                    |
| AB301       | 53         | 3                        | Negative   | Negative   | NA           | NA        | Negative              |
| AB304       | 2          | 3                        | IgM only   | IgG + IgM  | NA           | NA        | NA                    |
| AB329       | 6          | 3                        | Negative   | Negative   | NA           | NA        | NA                    |
| AB358       | 15         | 3                        | Negative   | Negative   | NA           | NA        | Negative              |
| AB371       | 33         | 3                        | IgG + IgM  | Negative   | NA           | NA        | NA                    |
| AB16        | 29         | 4                        | IgG + IgM  | Negative   | NA           | NA        | Positive              |
| AB18        | 37         | 4                        | IgG + IgM  | IgG + IgM  | NA           | NA        | Positive              |
| AB53        | 29         | 4                        | IgG + IgM  | Negative   | NA           | NA        | Positive              |
| AB58        | 53         | 4                        | Negative   | Negative   | NA           | NA        | NA                    |

| Specimen ID | Patient ID | Days since symptom onset | BTNX Kit    |            | ACON         | SD        | Abbott SARS-CoV-2 IgG |
|-------------|------------|--------------------------|-------------|------------|--------------|-----------|-----------------------|
|             |            |                          | BTNX Kit 1  | BTNX Kit 2 | Laboratories | Biosensor |                       |
| AB88        |            | 9                        | 4 Negative  | Negative   | NA           | NA        | Negative              |
| AB99        |            | 59                       | 4 Negative  | Negative   | NA           | NA        | Negative              |
| AB107       |            | 9                        | 4 Negative  | Negative   | NA           | NA        | Negative              |
| AB149       |            | 14                       | 4 Negative  | Negative   | NA           | NA        | Negative              |
| AB158       |            | 6                        | 4 Negative  | Negative   | NA           | NA        | Negative              |
| AB160       |            | 19                       | 4 Negative  | IgM only   | NA           | NA        | NA                    |
| AB170       |            | 17                       | 4 Negative  | Negative   | NA           | NA        | NA                    |
| AB174       |            | 33                       | 4 IgG + IgM | IgG only   | NA           | NA        | NA                    |
| AB204       |            | 33                       | 4 IgG + IgM | IgG + IgM  | NA           | NA        | NA                    |
| AB285       |            | 53                       | 4 Negative  | Negative   | NA           | NA        | NA                    |
| AB289       |            | 53                       | 4 Negative  | Negative   | NA           | NA        | NA                    |
| AB318       |            | 53                       | 4 Negative  | Negative   | NA           | NA        | NA                    |
| AB339       |            | 39                       | 4 Negative  | Negative   | NA           | NA        | Negative              |
| AB346       |            | 22                       | 4 Negative  | Negative   | NA           | NA        | Negative              |
| AB366       |            | 9                        | 4 Negative  | Negative   | NA           | NA        | Negative              |
| AB391       |            | 29                       | 4 IgG + IgM | Negative   | NA           | NA        | Positive              |
| AB4         |            | 12                       | 5 Negative  | Negative   | NA           | NA        | NA                    |
| AB24        |            | 48                       | 5 Negative  | Negative   | NA           | NA        | Negative              |
| AB73        |            | 52                       | 5 Negative  | Negative   | NA           | NA        | Negative              |
| AB80        |            | 50                       | 5 Negative  | Negative   | NA           | NA        | NA                    |
| AB82        |            | 53                       | 5 Negative  | Negative   | NA           | NA        | NA                    |
| AB83        |            | 33                       | 5 IgG + IgM | IgG + IgM  | NA           | NA        | NA                    |
| AB109       |            | 9                        | 5 IgG only  | Negative   | NA           | NA        | NA                    |
| AB162       |            | 31                       | 5 Negative  | Negative   | NA           | NA        | Negative              |
| AB172       |            | 15                       | 5 Negative  | Negative   | NA           | NA        | Negative              |
| AB180       |            | 15                       | 5 Negative  | Negative   | NA           | NA        | Negative              |
| AB187       |            | 31                       | 5 Negative  | Negative   | NA           | NA        | Negative              |
| AB189       |            | 17                       | 5 Negative  | Negative   | NA           | NA        | NA                    |
| AB210       |            | 6                        | 5 Negative  | Negative   | NA           | NA        | NA                    |
| AB211       |            | 43                       | 5 Negative  | Negative   | NA           | NA        | Negative              |
| AB279       |            | 22                       | 5 Negative  | Negative   | NA           | NA        | NA                    |
| AB284       |            | 52                       | 5 IgM only  | Negative   | NA           | NA        | Negative              |
| AB309       |            | 15                       | 5 Negative  | Negative   | NA           | NA        | Negative              |
| AB353       |            | 42                       | 5 Negative  | Negative   | NA           | NA        | Negative              |
| AB380       |            | 15                       | 5 Negative  | Negative   | NA           | NA        | Negative              |
| AB386       |            | 42                       | 5 Negative  | Negative   | NA           | NA        | Negative              |
| AB387       |            | 31                       | 5 Negative  | Negative   | NA           | NA        | Negative              |
| AB389       |            | 43                       | 5 Negative  | Negative   | NA           | NA        | Negative              |
| AB399       |            | 48                       | 5 Negative  | Negative   | NA           | NA        | Negative              |
| AB26        |            | 50                       | 6 Negative  | Negative   | NA           | NA        | Negative              |
| AB40        |            | 6                        | 6 Negative  | Negative   | NA           | NA        | Negative              |
| AB62        |            | 48                       | 6 Negative  | Negative   | NA           | NA        | NA                    |
| AB63        |            | 26                       | 6 IgG + IgM | IgM only   | NA           | NA        | NA                    |
| AB76        |            | 22                       | 6 Negative  | Negative   | NA           | NA        | Negative              |
| AB116       |            | 15                       | 6 Negative  | Negative   | NA           | NA        | Negative              |
| AB122       |            | 18                       | 6 Negative  | Negative   | NA           | NA        | Negative              |
| AB229       |            | 17                       | 6 Negative  | Negative   | NA           | NA        | NA                    |
| AB307       |            | 12                       | 6 Negative  | Negative   | NA           | NA        | NA                    |
| AB17        |            | 32                       | 7 Negative  | Negative   | NA           | NA        | Negative              |
| AB25        |            | 32                       | 7 IgM only  | Negative   | NA           | NA        | Negative              |
| AB36        |            | 23                       | 7 IgG + IgM | IgG + IgM  | NA           | NA        | Positive              |
| AB46        |            | 32                       | 7 Negative  | Negative   | NA           | NA        | Negative              |
| AB51        |            | 12                       | 7 Negative  | Negative   | NA           | NA        | NA                    |

| Specimen ID | Patient ID | Days since symptom onset | BTNX Kit    |            | ACON         | SD        | Abbott SARS-CoV-2 IgG |
|-------------|------------|--------------------------|-------------|------------|--------------|-----------|-----------------------|
|             |            |                          | BTNX Kit 1  | BTNX Kit 2 | Laboratories | Biosensor |                       |
| AB64        |            | 32                       | 7 Negative  | Negative   | NA           | NA        | Negative              |
| AB68        |            | 32                       | 7 IgM only  | Negative   | NA           | NA        | Negative              |
| AB72        |            | 32                       | 7 IgM only  | Negative   | NA           | NA        | Negative              |
| AB85        |            | 18                       | 7 Negative  | Negative   | NA           | NA        | Negative              |
| AB96        |            | 18                       | 7 Negative  | Negative   | NA           | NA        | Negative              |
| AB98        |            | 5                        | 7 Negative  | Negative   | NA           | NA        | Negative              |
| AB102       |            | 5                        | 7 Negative  | Negative   | NA           | NA        | Negative              |
| AB106       |            | 5                        | 7 Negative  | Negative   | NA           | NA        | Negative              |
| AB117       |            | 10                       | 7 Negative  | Negative   | NA           | NA        | Negative              |
| AB125       |            | 4                        | 7 Negative  | Negative   | NA           | NA        | Negative              |
| AB131       |            | 4                        | 7 Negative  | Negative   | NA           | NA        | Negative              |
| AB137       |            | 10                       | 7 Negative  | Negative   | NA           | NA        | Negative              |
| AB148       |            | 5                        | 7 Negative  | Negative   | NA           | NA        | Negative              |
| AB271       |            | 32                       | 7 Negative  | Negative   | NA           | NA        | Negative              |
| AB276       |            | 6                        | 7 Negative  | Negative   | NA           | NA        | NA                    |
| AB297       |            | 23                       | 7 IgG + IgM | IgG + IgM  | NA           | NA        | Positive              |
| AB306       |            | 23                       | 7 IgG + IgM | IgG + IgM  | NA           | NA        | Positive              |
| AB327       |            | 32                       | 7 IgM only  | Negative   | NA           | NA        | Negative              |
| AB333       |            | 58                       | 7 IgG + IgM | IgG + IgM  | NA           | NA        | Positive              |
| AB350       |            | 32                       | 7 Negative  | Negative   | NA           | NA        | Negative              |
| AB8         |            | 63                       | 8 IgG + IgM | IgG + IgM  | NA           | NA        | Positive              |
| AB14        |            | 23                       | 8 Negative  | IgG + IgM  | NA           | NA        | NA                    |
| AB32        |            | 23                       | 8 IgG + IgM | IgG + IgM  | NA           | NA        | NA                    |
| AB37        |            | 23                       | 8 IgG + IgM | IgG + IgM  | NA           | NA        | NA                    |
| AB41        |            | 6                        | 8 Negative  | Negative   | NA           | NA        | Negative              |
| AB56        |            | 32                       | 8 IgM only  | Negative   | NA           | NA        | Negative              |
| AB57        |            | 64                       | 8 Negative  | Negative   | NA           | NA        | Negative              |
| AB94        |            | 22                       | 8 Negative  | Negative   | NA           | NA        | Negative              |
| AB123       |            | 5                        | 8 Negative  | Negative   | NA           | NA        | Negative              |
| AB142       |            | 18                       | 8 Negative  | Negative   | NA           | NA        | Negative              |
| AB177       |            | 10                       | 8 Negative  | IgG only   | NA           | NA        | Negative              |
| AB201       |            | 4                        | 8 Negative  | Negative   | NA           | NA        | Negative              |
| AB203       |            | 10                       | 8 Negative  | IgG + IgM  | NA           | NA        | Negative              |
| AB273       |            | 32                       | 8 IgM only  | Negative   | NA           | NA        | Negative              |
| AB280       |            | 42                       | 8 IgG only  | IgG + IgM  | NA           | NA        | Positive              |
| AB292       |            | 42                       | 8 IgG only  | Negative   | NA           | NA        | Positive              |
| AB324       |            | 19                       | 8 IgG + IgM | IgG + IgM  | NA           | NA        | NA                    |
| AB325       |            | 18                       | 8 Negative  | Negative   | NA           | NA        | Negative              |
| AB384       |            | 63                       | 8 IgG + IgM | IgG + IgM  | NA           | NA        | Positive              |
| AB1         |            | 1                        | 9 IgG + IgM | IgG + IgM  | NA           | NA        | Positive              |
| AB13        |            | 19                       | 9 IgG + IgM | IgG + IgM  | NA           | NA        | NA                    |
| AB21        |            | 32                       | 9 Negative  | Negative   | NA           | NA        | Negative              |
| AB91        |            | 49                       | 9 Negative  | IgM only   | NA           | NA        | NA                    |
| AB92        |            | 10                       | 9 IgM only  | IgG + IgM  | NA           | NA        | Positive              |
| AB101       |            | 4                        | 9 Negative  | Negative   | NA           | NA        | NA                    |
| AB124       |            | 18                       | 9 IgM only  | IgG only   | NA           | NA        | Negative              |
| AB127       |            | 5                        | 9 Negative  | Negative   | NA           | NA        | Negative              |
| AB200       |            | 18                       | 9 IgM only  | IgG only   | NA           | NA        | Negative              |
| AB220       |            | 5                        | 9 Negative  | Negative   | NA           | NA        | Negative              |
| AB274       |            | 8                        | 9 Negative  | Negative   | NA           | NA        | NA                    |
| AB299       |            | 34                       | 9 IgG only  | IgM only   | NA           | NA        | NA                    |
| AB305       |            | 42                       | 9 IgG only  | IgG + IgM  | NA           | NA        | Positive              |
| AB312       |            | 15                       | 9 Negative  | Negative   | NA           | NA        | NA                    |

| Specimen ID | Patient ID | Days since symptom onset | BTNX Kit     |            | ACON         | SD        | Abbott SARS-CoV-2 IgG |
|-------------|------------|--------------------------|--------------|------------|--------------|-----------|-----------------------|
|             |            |                          | BTNX Kit 1   | BTNX Kit 2 | Laboratories | Biosensor |                       |
| AB317       |            | 34                       | 9 Negative   | IgM only   | NA           | NA        | NA                    |
| AB343       |            | 10                       | 9 IgG + IgM  | IgG + IgM  | NA           | NA        | Positive              |
| AB372       |            | 49                       | 9 Negative   | IgM only   | NA           | NA        | NA                    |
| AB379       |            | 34                       | 9 IgG only   | Negative   | NA           | NA        | NA                    |
| AB22        |            | 45                       | 10 IgG + IgM | IgG + IgM  | NA           | NA        | Positive              |
| AB47        |            | 42                       | 10 IgG only  | IgG + IgM  | NA           | NA        | Positive              |
| AB54        |            | 60                       | 10 IgM only  | IgM only   | NA           | NA        | Negative              |
| AB60        |            | 45                       | 10 IgG + IgM | IgG + IgM  | NA           | NA        | Positive              |
| AB175       |            | 34                       | 10 IgG only  | IgG + IgM  | NA           | NA        | Positive              |
| AB191       |            | 18                       | 10 IgM only  | IgG + IgM  | NA           | NA        | NA                    |
| AB195       |            | 18                       | 10 IgM only  | IgG + IgM  | NA           | NA        | NA                    |
| AB196       |            | 5                        | 10 Negative  | Negative   | NA           | NA        | Negative              |
| AB217       |            | 4                        | 10 IgG + IgM | Negative   | NA           | NA        | Negative              |
| AB331       |            | 32                       | 10 IgG + IgM | Negative   | NA           | NA        | Positive              |
| AB347       |            | 19                       | 10 IgG + IgM | IgG + IgM  | NA           | NA        | NA                    |
| AB356       |            | 60                       | 10 Negative  | IgM only   | NA           | NA        | Negative              |
| AB383       |            | 34                       | 10 IgG only  | Negative   | NA           | NA        | Positive              |
| AB388       |            | 19                       | 10 IgG + IgM | IgG + IgM  | NA           | NA        | NA                    |
| AB7         |            | 53                       | 11 IgG + IgM | IgG + IgM  | NA           | NA        | Positive              |
| AB29        |            | 34                       | 11 IgG only  | IgG + IgM  | NA           | NA        | Positive              |
| AB104       |            | 7                        | 11 IgG only  | IgG + IgM  | NA           | NA        | Positive              |
| AB179       |            | 36                       | 11 IgG only  | IgG + IgM  | NA           | NA        | Positive              |
| AB198       |            | 4                        | 11 IgG + IgM | IgM only   | NA           | NA        | Positive              |
| AB209       |            | 42                       | 11 IgG only  | IgG + IgM  | NA           | NA        | Positive              |
| AB215       |            | 5                        | 11 Negative  | Negative   | NA           | NA        | Negative              |
| AB223       |            | 18                       | 11 IgG + IgM | IgG + IgM  | NA           | NA        | NA                    |
| AB233       |            | 17                       | 11 IgG + IgM | IgG + IgM  | NA           | NA        | Positive              |
| AB315       |            | 10                       | 11 IgG + IgM | IgG + IgM  | NA           | NA        | Positive              |
| AB357       |            | 36                       | 11 IgG only  | IgG + IgM  | NA           | NA        | Positive              |
| AB44        |            | 10                       | 12 IgG + IgM | IgG + IgM  | NA           | NA        | NA                    |
| AB128       |            | 7                        | 12 IgG only  | IgG + IgM  | NA           | NA        | Positive              |
| AB153       |            | 7                        | 12 IgG only  | IgG + IgM  | NA           | NA        | Positive              |
| AB171       |            | 10                       | 12 IgG + IgM | IgG + IgM  | NA           | NA        | NA                    |
| AB190       |            | 34                       | 12 IgG only  | IgG + IgM  | NA           | NA        | NA                    |
| AB192       |            | 5                        | 12 IgM only  | IgM only   | NA           | NA        | Negative              |
| AB226       |            | 4                        | 12 IgG only  | IgG + IgM  | NA           | NA        | Positive              |
| AB330       |            | 42                       | 12 IgG + IgM | IgG + IgM  | NA           | NA        | Positive              |
| AB89        |            | 34                       | 13 IgG only  | IgG + IgM  | NA           | NA        | Positive              |
| AB108       |            | 10                       | 13 IgG + IgM | IgG + IgM  | NA           | NA        | Positive              |
| AB130       |            | 7                        | 13 IgG only  | IgG + IgM  | NA           | NA        | NA                    |
| AB165       |            | 5                        | 13 IgM only  | IgG + IgM  | NA           | NA        | Positive              |
| AB166       |            | 4                        | 13 IgG only  | IgG + IgM  | NA           | NA        | Positive              |
| AB224       |            | 5                        | 13 IgM only  | IgG + IgM  | NA           | NA        | Positive              |
| AB241       |            | 5                        | 13 IgG + IgM | IgG + IgM  | NA           | NA        | Positive              |
| AB385       |            | 5                        | 13 IgG + IgM | Negative   | NA           | NA        | Positive              |
| AB45        |            | 5                        | 14 IgG + IgM | IgG + IgM  | IgG + IgM    | Positive  | Positive              |
| AB52        |            | 5                        | 14 IgG + IgM | IgG + IgM  | IgG + IgM    | Positive  | Positive              |
| AB97        |            | 24                       | 14 IgG + IgM | IgM only   | IgG + IgM    | Positive  | Positive              |
| AB132       |            | 7                        | 14 IgG only  | IgG + IgM  | IgG + IgM    | Positive  | Positive              |
| AB140       |            | 24                       | 14 IgG + IgM | Negative   | IgG + IgM    | Positive  | Positive              |
| AB141       |            | 10                       | 14 IgG + IgM | IgG + IgM  | IgG + IgM    | Positive  | Positive              |
| AB144       |            | 7                        | 14 IgG only  | IgG + IgM  | IgG + IgM    | Positive  | Positive              |
| AB145       |            | 7                        | 14 IgG only  | IgG + IgM  | IgG + IgM    | Positive  | Positive              |

| Specimen ID | Patient ID | Days since symptom onset |    | BTNX Kit 1 | BTNX Kit 2 | ACON Laboratories | SD Biosensor | Abbott SARS-CoV-2 IgG |
|-------------|------------|--------------------------|----|------------|------------|-------------------|--------------|-----------------------|
|             |            |                          |    |            |            |                   |              |                       |
| AB176       |            | 5                        | 14 | IgG + IgM  | IgG + IgM  | IgG + IgM         | Positive     | Positive              |
| AB282       |            | 5                        | 14 | IgG + IgM  | IgG + IgM  | IgG + IgM         | NA           | Positive              |
| AB337       |            | 5                        | 14 | IgG + IgM  | IgG + IgM  | IgG + IgM         | NA           | Positive              |
| AB400       |            | 5                        | 14 | IgG + IgM  | IgG + IgM  | IgG + IgM         | NA           | Positive              |
| AB48        |            | 5                        | 15 | IgG + IgM  | IgG + IgM  | IgG + IgM         | Positive     | Positive              |
| AB59        |            | 65                       | 15 | Negative   | Negative   | Negative          | Negative     | Negative              |
| AB65        |            | 65                       | 15 | Negative   | Negative   | Negative          | Negative     | Negative              |
| AB155       |            | 24                       | 15 | IgG + IgM  | Negative   | IgG + IgM         | Positive     | Positive              |
| AB157       |            | 7                        | 15 | IgG only   | IgG + IgM  | IgG + IgM         | Positive     | Positive              |
| AB219       |            | 7                        | 15 | IgG only   | IgG + IgM  | IgG + IgM         | NA           | Positive              |
| AB225       |            | 24                       | 15 | IgG + IgM  | IgG + IgM  | IgG + IgM         | NA           | Positive              |
| AB228       |            | 7                        | 15 | IgG only   | IgG + IgM  | IgG + IgM         | NA           | Positive              |
| AB239       |            | 7                        | 15 | IgG only   | IgG + IgM  | IgG + IgM         | NA           | Positive              |
| AB369       |            | 4                        | 15 | IgG only   | IgG + IgM  | IgG + IgM         | NA           | NA                    |
| AB23        |            | 42                       | 16 | IgG only   | IgG + IgM  | IgG only          | Positive     | Positive              |
| AB164       |            | 7                        | 16 | IgG only   | IgG + IgM  | IgG + IgM         | Positive     | NA                    |
| AB207       |            | 5                        | 16 | IgG + IgM  | IgG + IgM  | IgG + IgM         | NA           | Positive              |
| AB234       |            | 7                        | 16 | IgG only   | IgG + IgM  | IgG + IgM         | NA           | NA                    |
| AB321       |            | 16                       | 16 | IgG only   | IgG + IgM  | IgG + IgM         | NA           | NA                    |
| AB115       |            | 5                        | 17 | IgG + IgM  | IgG + IgM  | IgG + IgM         | Positive     | Positive              |
| AB118       |            | 16                       | 17 | IgG + IgM  | IgG + IgM  | IgG + IgM         | Positive     | Positive              |
| AB208       |            | 24                       | 17 | IgG + IgM  | IgG + IgM  | IgG + IgM         | NA           | Positive              |
| AB288       |            | 7                        | 17 | IgG only   | IgG + IgM  | IgG + IgM         | NA           | NA                    |
| AB295       |            | 7                        | 17 | IgG only   | IgG + IgM  | IgG + IgM         | NA           | NA                    |
| AB298       |            | 10                       | 17 | IgG + IgM  | IgG + IgM  | IgG + IgM         | NA           | Positive              |
| AB308       |            | 10                       | 17 | IgG + IgM  | IgG + IgM  | IgG + IgM         | NA           | Positive              |
| AB316       |            | 7                        | 17 | IgG only   | IgG + IgM  | IgG + IgM         | NA           | NA                    |
| AB9         |            | 10                       | 18 | IgG + IgM  | IgG + IgM  | IgG + IgM         | Positive     | Positive              |
| AB66        |            | 10                       | 18 | IgG + IgM  | IgG + IgM  | IgG + IgM         | Positive     | Positive              |
| AB126       |            | 16                       | 18 | IgG only   | IgG + IgM  | IgG + IgM         | Positive     | Positive              |
| AB143       |            | 16                       | 18 | IgG only   | IgG + IgM  | IgG + IgM         | Positive     | Positive              |
| AB185       |            | 24                       | 18 | IgG + IgM  | IgG + IgM  | IgG + IgM         | NA           | Positive              |
| AB290       |            | 7                        | 18 | IgG only   | IgG + IgM  | IgG + IgM         | NA           | Positive              |
| AB300       |            | 7                        | 18 | IgG only   | IgG + IgM  | IgG + IgM         | NA           | Positive              |
| AB319       |            | 7                        | 18 | IgG only   | IgG + IgM  | IgG + IgM         | NA           | Positive              |
| AB348       |            | 42                       | 18 | IgG only   | IgG + IgM  | IgG + IgM         | NA           | Positive              |
| AB49        |            | 10                       | 19 | IgG + IgM  | IgG + IgM  | IgG + IgM         | Positive     | Positive              |
| AB87        |            | 16                       | 19 | IgG only   | IgG + IgM  | IgG only          | Positive     | Positive              |
| AB133       |            | 20                       | 19 | IgG only   | IgG + IgM  | IgG + IgM         | Positive     | Positive              |
| AB206       |            | 20                       | 19 | IgG + IgM  | IgG + IgM  | IgG + IgM         | NA           | Positive              |
| AB313       |            | 7                        | 19 | IgG only   | IgG + IgM  | IgG + IgM         | NA           | NA                    |
| AB341       |            | 20                       | 19 | IgG + IgM  | IgG + IgM  | IgG + IgM         | NA           | Positive              |
| AB34        |            | 10                       | 20 | IgG + IgM  | IgG + IgM  | IgG + IgM         | Positive     | Positive              |
| AB156       |            | 16                       | 20 | IgG only   | IgG + IgM  | IgG + IgM         | Positive     | Positive              |
| AB167       |            | 7                        | 20 | IgG only   | IgG + IgM  | IgG + IgM         | Positive     | Positive              |
| AB173       |            | 20                       | 20 | IgG only   | IgG + IgM  | IgG + IgM         | Positive     | Positive              |
| AB231       |            | 7                        | 20 | IgG only   | IgG + IgM  | IgG + IgM         | NA           | Positive              |
| AB272       |            | 10                       | 20 | IgG + IgM  | IgG + IgM  | IgG + IgM         | NA           | Positive              |
| AB374       |            | 10                       | 20 | IgG + IgM  | IgG + IgM  | IgG + IgM         | NA           | Positive              |
| AB396       |            | 20                       | 20 | IgG + IgM  | IgG + IgM  | IgG + IgM         | NA           | Positive              |
| AB90        |            | 7                        | 21 | IgG only   | IgG + IgM  | IgG + IgM         | Positive     | Positive              |
| AB134       |            | 20                       | 21 | IgG + IgM  | IgG + IgM  | IgG only          | Positive     | Positive              |
| AB151       |            | 7                        | 21 | IgG only   | IgG + IgM  | IgG + IgM         | Positive     | Positive              |

| Specimen ID | Patient ID | Days since symptom onset |              |            | ACON Laboratories | SD Biosensor | Abbott SARS-CoV-2 IgG |
|-------------|------------|--------------------------|--------------|------------|-------------------|--------------|-----------------------|
|             |            | onset                    | BTNX Kit 1   | BTNX Kit 2 |                   |              |                       |
| AB159       |            | 7                        | 21 IgG only  | IgG + IgM  | IgG + IgM         | Positive     | Positive              |
| AB184       |            | 7                        | 21 IgG only  | IgG + IgM  | IgG + IgM         | Positive     | Positive              |
| AB193       |            | 7                        | 21 IgG only  | IgG + IgM  | IgG + IgM         | NA           | Positive              |
| AB238       |            | 7                        | 21 IgG only  | IgG + IgM  | IgG + IgM         | NA           | Positive              |
| AB352       |            | 55                       | 21 IgM only  | Negative   | Negative          | NA           | Positive              |
| AB19        |            | 5                        | 22 IgG + IgM | IgG + IgM  | IgG + IgM         | Positive     | Positive              |
| AB136       |            | 20                       | 22 IgG + IgM | IgG + IgM  | IgG + IgM         | Positive     | Positive              |
| AB214       |            | 20                       | 22 IgG + IgM | IgG + IgM  | IgG + IgM         | NA           | Positive              |
| AB12        |            | 4                        | 23 IgG only  | IgG + IgM  | IgG + IgM         | Positive     | NA                    |
| AB38        |            | 5                        | 23 IgG + IgM | IgG + IgM  | IgG + IgM         | Positive     | NA                    |
| AB168       |            | 20                       | 23 IgG only  | IgG + IgM  | IgG only          | Positive     | Positive              |
| AB213       |            | 20                       | 23 IgG + IgM | IgG + IgM  | IgG + IgM         | NA           | Positive              |
| AB218       |            | 20                       | 23 IgG + IgM | IgG + IgM  | IgG + IgM         | NA           | Positive              |
| AB227       |            | 20                       | 23 IgG only  | IgG + IgM  | IgG + IgM         | NA           | Positive              |
| AB2         |            | 40                       | 24 Negative  | IgM only   | Negative          | Negative     | NA                    |
| AB81        |            | 40                       | 24 Negative  | Negative   | Negative          | Negative     | NA                    |
| AB202       |            | 20                       | 24 IgG + IgM | IgG + IgM  | IgG + IgM         | NA           | Positive              |
| AB205       |            | 20                       | 24 IgG only  | IgG + IgM  | IgG only          | NA           | Positive              |
| AB28        |            | 24                       | 25 IgG only  | IgG + IgM  | IgG + IgM         | Positive     | Positive              |
| AB293       |            | 24                       | 25 IgG + IgM | IgG + IgM  | IgG + IgM         | NA           | Positive              |
| AB3         |            | 24                       | 26 IgG only  | IgG + IgM  | IgG + IgM         | Positive     | Positive              |
| AB43        |            | 20                       | 26 IgG only  | IgG + IgM  | IgG only          | Positive     | Positive              |
| AB275       |            | 20                       | 26 IgG only  | IgG + IgM  | IgG only          | NA           | Positive              |
| AB283       |            | 20                       | 26 IgG + IgM | IgG + IgM  | IgG + IgM         | NA           | Positive              |
| AB30        |            | 20                       | 27 IgG only  | IgG + IgM  | IgG only          | Positive     | Positive              |
| AB77        |            | 20                       | 27 IgG only  | IgG + IgM  | IgG only          | Positive     | Positive              |
| AB320       |            | 20                       | 27 IgG + IgM | IgG + IgM  | IgG + IgM         | NA           | Positive              |
| AB181       |            | 20                       | 28 IgG + IgM | IgG + IgM  | IgG only          | Positive     | Positive              |
| AB188       |            | 20                       | 28 IgG only  | IgG + IgM  | IgG only          | NA           | Positive              |
| AB163       |            | 20                       | 29 IgG only  | IgG + IgM  | IgG + IgM         | Positive     | Positive              |
| AB221       |            | 20                       | 29 IgG only  | IgG + IgM  | IgG only          | NA           | Positive              |
| AB6         |            | 55                       | 31 IgG + IgM | IgG + IgM  | IgG + IgM         | Positive     | Positive              |
| AB33        |            | 55                       | 31 IgG + IgM | IgG + IgM  | IgG + IgM         | Positive     | Positive              |
| AB296       |            | 55                       | 31 IgG + IgM | Negative   | IgG + IgM         | NA           | Positive              |

**Supplementary Table S1.** Results from four lateral flow assays [Rapid Response™ COVID-19 Test Cassette (BTNX Inc.) Kit 1, Rapid Response™ COVID-19 Test Cassette (BTNX Inc.) Kit 2, SARS-CoV-2 IgG/IgM Rapid Test (ACON Laboratories), and Standard Q COVID-19 IgM/IgG Duo (SD BIOSENSOR)] for 352 primarily hospitalized individuals with COVID-19. Abbott SARS-CoV-2 IgG results were supplied for reference by the Department of Laboratory Medicine at the University of Washington School of Medicine (Seattle, WA), who also supplied the specimens.

| Sample ID | BTNX kit 1 IgG | BTNX kit 2 IgG | ACON IgG | SD IgG | Notes on reactivity                                                        |
|-----------|----------------|----------------|----------|--------|----------------------------------------------------------------------------|
| S559      | +              | -              | -        | -      | Positive P-ANCA within one week of collection                              |
| S582      | Invalid        | -              | -        | -      | Band incorrect colour. Ongoing pulmonary infectious process                |
| S632      | +              | -              | -        | -      | Probable false positive coccidioides EIA IgM within one week of collection |
| SAV8      | -              | -              | +        | -      | Coronavirus HKU1 PCR positive 2 months prior                               |
| SAV48     | -              | -              | +        | -      | Serum reactive for HIV-1, HAV, HBV, and HCV antibodies                     |

**Supplementary Table S2.** False positive results from two lateral flow assays [Rapid Response™ COVID-19 Test Cassette (BTNX Inc.) Kit 1 and SARS-COV-2 IgG/IgM Rapid Test (ACON Laboratories)] detected among a set of 105 presumed negative specimens, including 31 carefully selected "cross reactivity challenge" specimens. Results for these specimens on Rapid Response™ COVID-19 Test Cassette (BTNX Inc.) Kit 1 and Standard Q COVID-19 IgM/IgG Duo (SD BIOSENSOR) are also shown for reference.



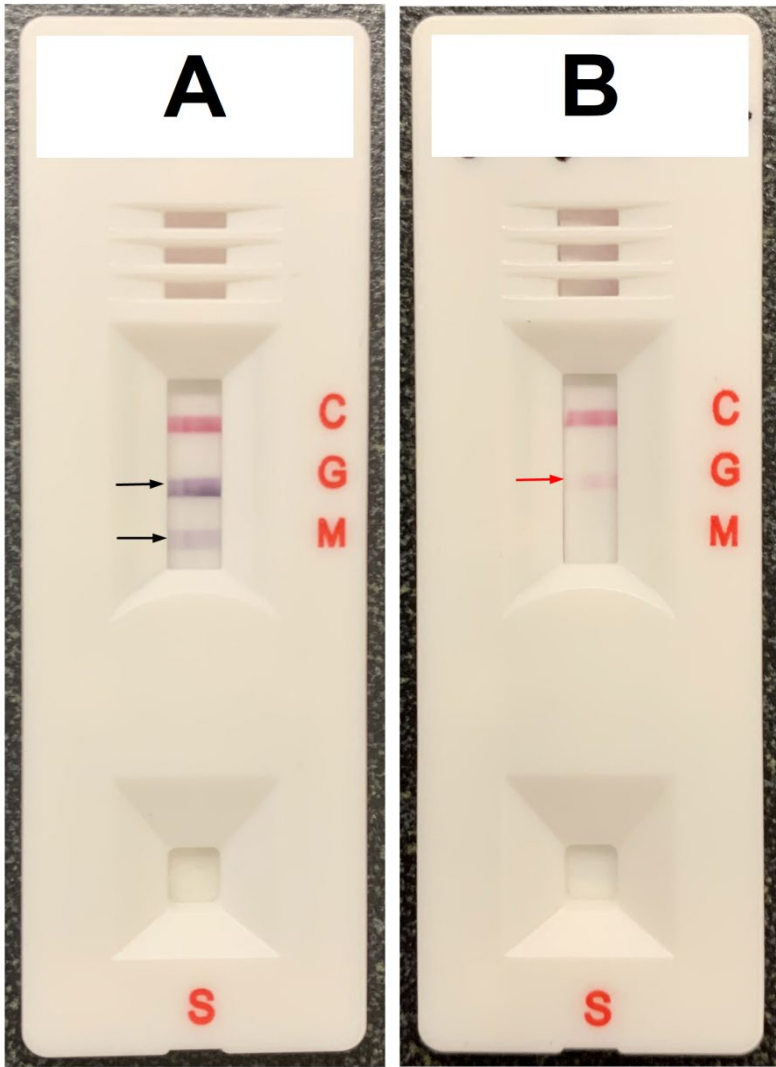

**Supplementary Figure S1.** A positive result on Rapid Response™ COVID-19 Test Cassette (BTNX Inc.) Kit 1 (cassette "A") as a comparison to an invalid result on the same assay (cassette "B"),
